# Supplementary material for: Efficacy and safety of Eradicat® feral cat baits in eastern Australia: population impacts of baiting programmes on feral cats and non-target mammals and birds
Source: Springer Nature journal article supplement (doi:10.1007/s10340-021-01433-9), 2021-10-01
Supplement: MOESM1 [file 10340_2021_1433_MOESM1_ESM.pdf]

## Supplementary Information

**Article:** Efficacy and safety of Eradicat<sup>®</sup> feral cat baits in eastern Australia: population impacts of baiting programs on feral cats and non-target mammals and birds

**Journal:** Journal of Pest Science

**Authors:** Fancourt BA\*, Harry G, Speed J and Gentle MN.

\*corresponding author: [bronwyn.fancourt@une.edu.au](mailto:bronwyn.fancourt@une.edu.au)

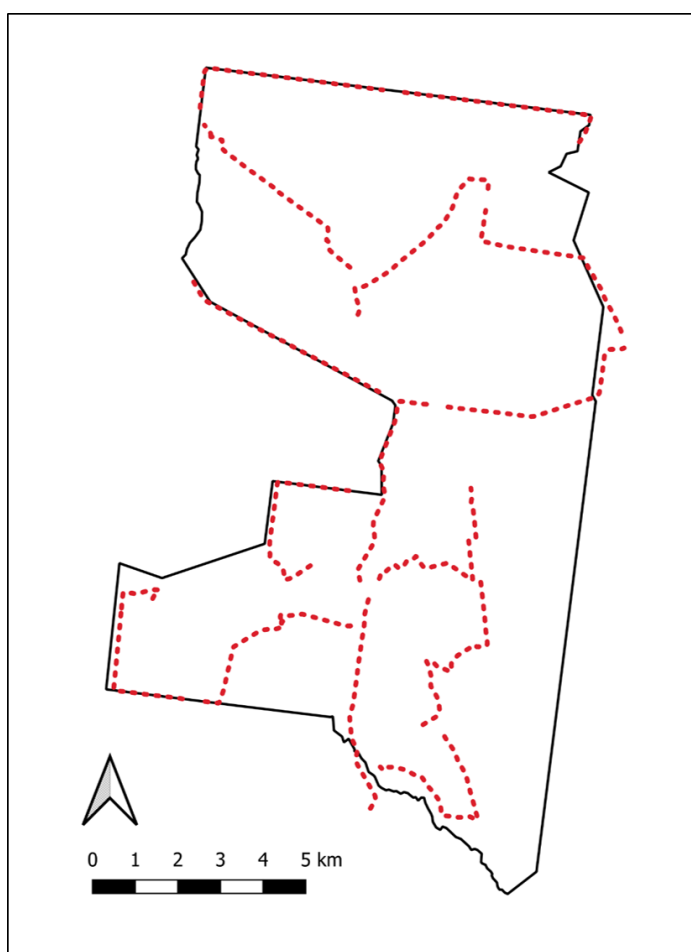

**Fig. S1** Map of unbaited site used in the current study. Red dashed lines indicate location of vehicle transects used for bird counts (n = 15 x 5 km transects).

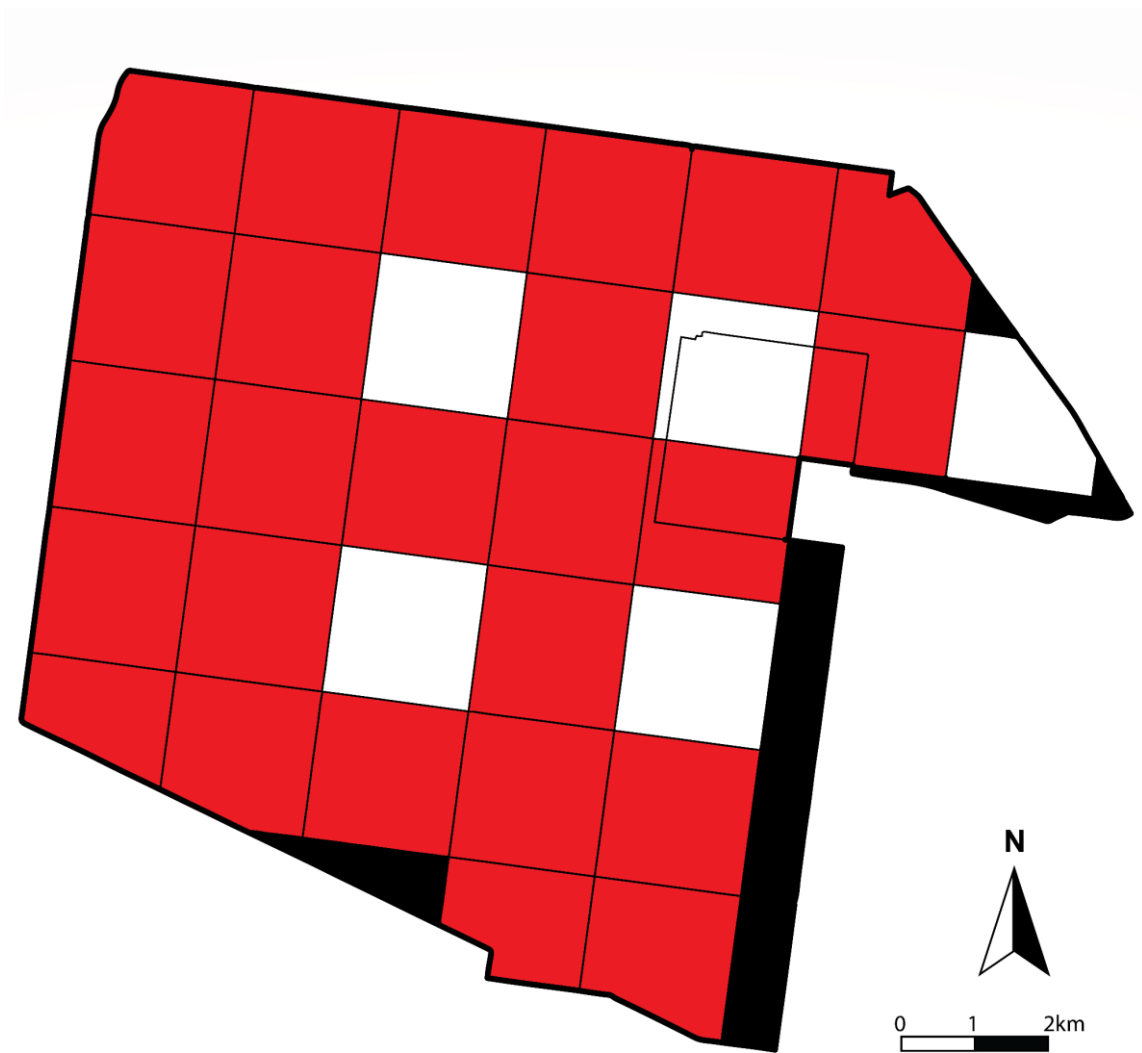

**Fig. S2** Map of Taunton National Park (Scientific) showing the spatial distribution of changes in feral cat abundance following Eradicat® baiting. Red grid cells indicate a reduction in cat abundance following baiting, white grid cells indicate an increase in cat abundance following baiting. Black shading indicates areas not included in population monitoring.

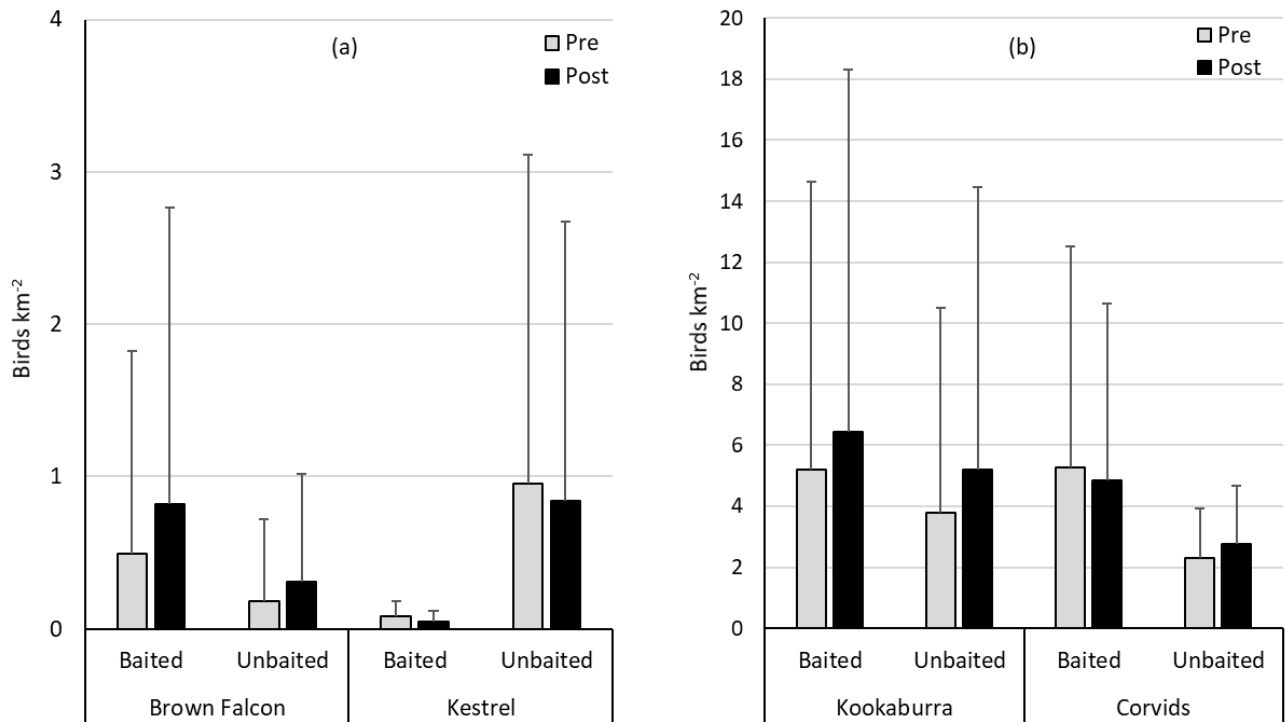

**Fig. S3** Mean densities (+ 95% confidence intervals) of each bird taxon where a potential baiting effect was observed following baiting, as per Table 3. Grey columns indicate densities pre-baiting, black columns indicate densities post-baiting at Taunton National Park (Scientific) (Baited site) and the unbaited site: (a) Brown falcon, Kestrel; (b) Kookaburra, Corvids.

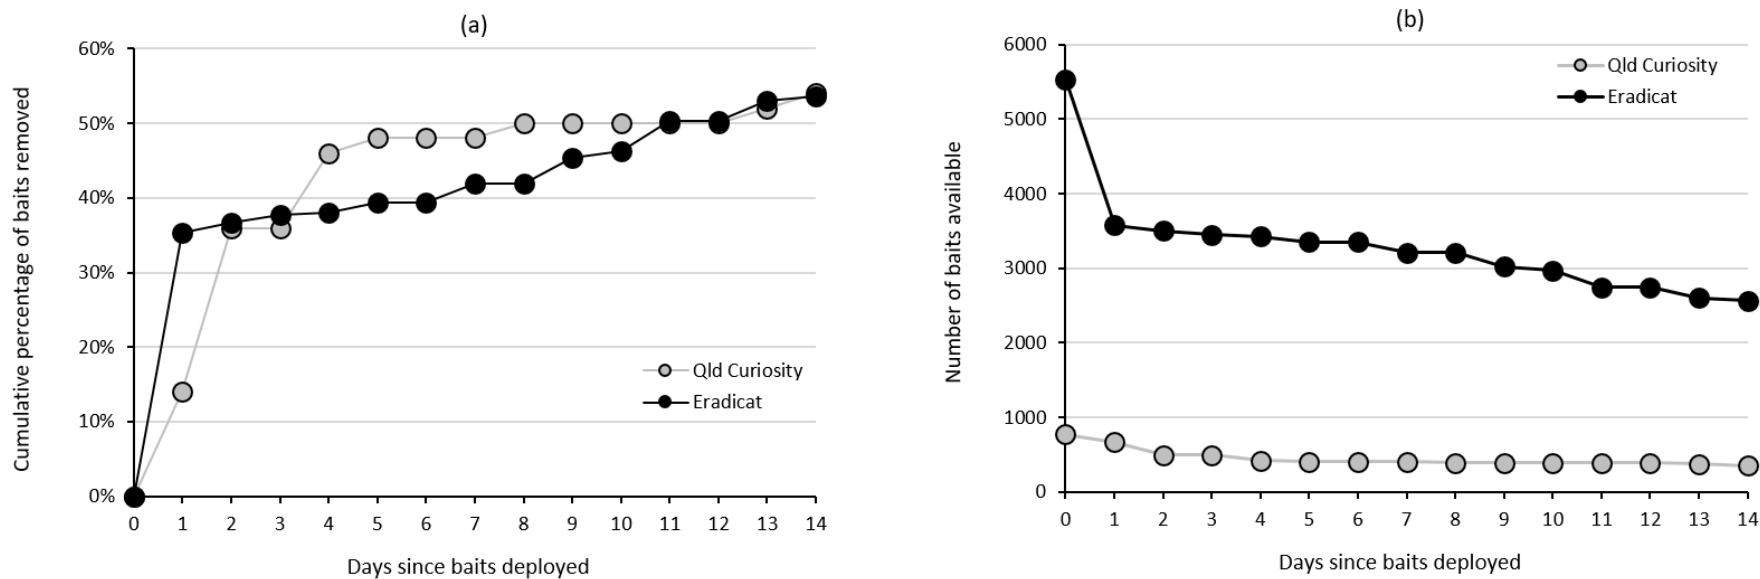

**Fig. S4** Comparison of bait removal rates for Eradicat<sup>®</sup> (July 2017; Fancourt et al. 2021b) and the fresh meat Queensland Curiosity Feral Cat Bait (July 2016; Fancourt et al. 2021a). Panel (a) shows rate of removal of a sample of monitored baits (Qld Curiosity: n = 50; Eradicat<sup>®</sup>: n = 75 baits). Panel (b) shows the estimated number of baits remaining in the landscape each day following bait deployment, calculated as total number of baits deployed (Qld Curiosity: n = 776; Eradicat<sup>®</sup>: n = 5530 baits) x proportion of baits remaining (100% - % of baits removed per panel (a)).

## References

- Fancourt BA et al. (2021a) Measuring, evaluating and improving the effectiveness of invasive predator control programs: feral cat baiting as a case study. *Journal of Environmental Management* 280:111691 doi:<https://doi.org/10.1016/j.jenvman.2020.111691>
- Fancourt BA, Zirbel C, Cremasco P, Elsworth P, Harry G, Gentle MN (2021b) Field assessment of the risk of feral cat baits to non-target species in eastern Australia. *Integrated Environmental Assessment and Management* doi:<https://doi.org/10.1002/ieam.4445>
